# Supplementary material for: In Vitro Activity of Oral Cephalosporins (Cefprozil and Cefixime) Against Ciprofloxacin-Resistant Enterobacteriaceae from Community-Acquired Urinary-Tract Infections
Source: Springer Nature journal article supplement (doi:10.1007/s40121-015-0089-3), 2015-09-21
Supplement: MOESM1 [file 9339758]

## *Why carry out this study?*

- There is increased prevalence of urinary tract infections by ciprofloxacin-resistant enterobacteria.
- The in vitro activity of oral cephalosporins was tested against ciprofloxacin-resistant uropathogens.

## *What was learned from the study?*

- Against non- extended-spectrum  $\beta$ -lactamases (ESBL) producing *Escherichia coli*, cefprozil was more active than ciprofloxacin (93.7 vs 80.2% of isolates inhibited). This was not the case for cefixime (85.7% vs 80.2% of isolates inhibited).
- The activity of cefprozil and cefixime was limited against ESBL producing isolates.
- Both cefprozil and cefixime were active against isolates resistant to ciprofloxacin.

This summary slide represents the opinions of the authors. Sponsorship for this study was funded by a donation from the Hellenic Institute for the Study of Sepsis. For a full list of acknowledgments and disclosures for all authors of this article, please see the full text online. © The Author(s) 2015. Creative Commons Attribution Noncommercial License (CC BY-NC).
